# Supplementary material for: Nanoapatites Doped and Co-Doped with Noble Metal Ions as Modern Antibiofilm Materials for Biomedical Applications against Drug-Resistant Clinical Strains of Enterococcus faecalis VRE and Staphylococcus aureus MRSA
Source: MDPI journal article supplement (doi:10.3390/ijms23031533), 2022-01-28
Supplement: s1 [file s1]

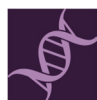

Supplementary material

# Nanoapatites doped and co-doped with noble metal ions as modern antibiofilm materials for biomedical applications against drug-resistant clinical strains of *Enterococcus faecalis* VRE and *Staphylococcus aureus* MRSA

Emil Paluch <sup>1,\*</sup>, Paulina Sobierajska <sup>2,\*</sup>, Piotr Okinczyc <sup>3</sup>, Jaroslaw Widelski <sup>4</sup>, Anna Duda-Madej <sup>1</sup>, Barbara Krzyzanowska <sup>1</sup>, Paweł Krzyzek <sup>1</sup>, Rafal Ogorek <sup>5</sup>, Jakub Szperlik <sup>6</sup>, Jacek Chmielowiec <sup>2</sup>, Grazyna Gosciniak <sup>1</sup> and Rafal J. Wiglusz <sup>2,\*</sup>

<sup>1</sup> Department of Microbiology, Faculty of Medicine, Wrocław Medical University, 50-376 Wrocław, Poland; emil.paluch@umw.edu.pl (E.P.); anna.duda-madej@umw.edu.pl (A.D-M.); pawel.krzyzek@umw.edu.pl (P.K.); barbara.krzyzanowska@umw.edu.pl (B.K.); grazyna.gosciniak@umw.edu.pl (G.G.)

<sup>2</sup> Institute of Low Temperature and Structure Research, Polish Academy of Sciences, Okolna 2, 50-422 Wrocław, Poland; p.sobierajska@intibs.pl (P.S.); j.chmielowiec@intibs.pl (J. C.); r.wiglusz@intibs.pl (R. J. W.)

<sup>3</sup> Department of Pharmacognosy and Herbal Medicines, Wrocław Medical University, 50-556 Wrocław, Poland; piotr.okinczyc@umw.edu.pl (P.O.)

<sup>4</sup> Department of Pharmacognosy with the Medicinal Plant Garden, Medical University of Lublin, 20-093 Lublin, Poland; jaroslaw.widelski@umlub.pl (J.W.)

<sup>5</sup> Department of Mycology and Genetics, University of Wrocław, Przybyszewskiego 63, 51-148 Wrocław, Poland; rafal.ogorek@uwr.edu.pl (R.O.)

<sup>6</sup> Faculty of Biological Sciences, Botanical Garden, University of Wrocław, Sienkiewicza 23, 50-525 Wrocław, Poland; 11 jakubsz@hotmail.com (J.S.)

\* Correspondence: emil.paluch@umw.edu.pl (E.P.); p.sobierajska@intibs.pl (P.S.); r.wiglusz@intibs.pl (R.J.W.)

## Table of content:

### Results:

**Figure S1.** EDS spectra of the nHAp and nanoapatites doped, double-doped and triple-doped with Ag<sup>+</sup>, Au<sup>+</sup> and Pd<sup>2+</sup> ions.....s2

**Figure S2.** Representative SEM images of the nHAp pellet and nanoapatites pellets doped with Ag<sup>+</sup>, Au<sup>+</sup> and Pd<sup>2+</sup> ions ..... s3

**Figure S3.** Adhesion of Balb/3T3 fibroblasts to surface tested nanoapatites and influence of the biofilm produced by *E. faecalis* VRE 200 and *S. aureus* MRSA P19 on the viability of Balb/3T3 fibroblasts.....s4

## Results

### EDS spectra of the nHAp and nanoapatites doped, double-doped and triple-doped with Ag<sup>+</sup>, Au<sup>+</sup> and Pd<sup>2+</sup> ions

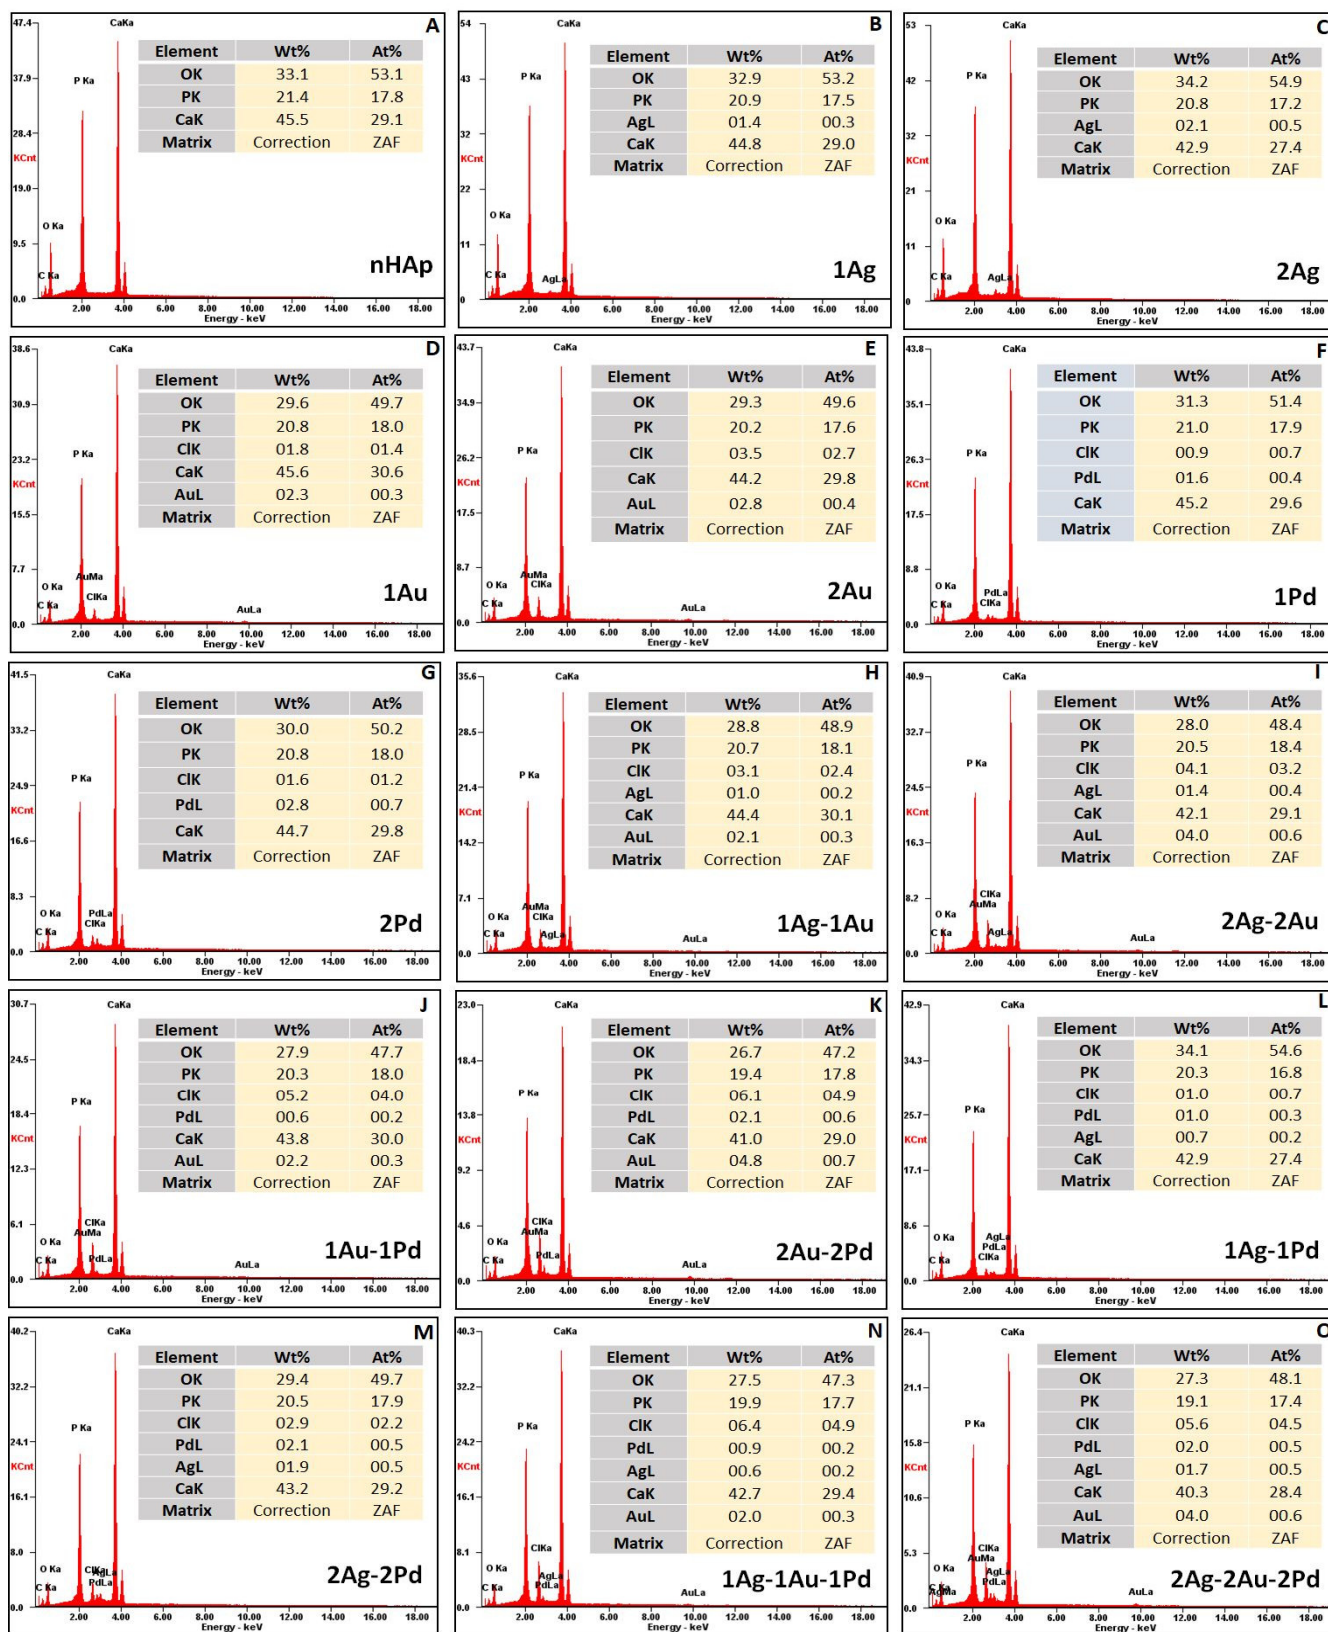

**Figure S1.** EDS spectra of the nHAp (A) and nanoapatites doped (B-G), double-doped (H-M) and triple-doped (N,O) with Ag<sup>+</sup>, Au<sup>+</sup> and Pd<sup>2+</sup> at a concentration of 1 mol% and 2 mol%, with the indication of Cl<sup>-</sup> ions. The table inside contains quantitative measurement data. Sample names have been abbreviated, e.g. sample code OH-Cl-Ap: 1 mol% Ag<sup>+</sup>, 1 mol% Au<sup>+</sup> is 1Ag-1Au.



*Representative SEM images of the nHAp pellet and nanoapatites pellets doped with Ag<sup>+</sup>, Au<sup>+</sup> and Pd<sup>2+</sup> ions*

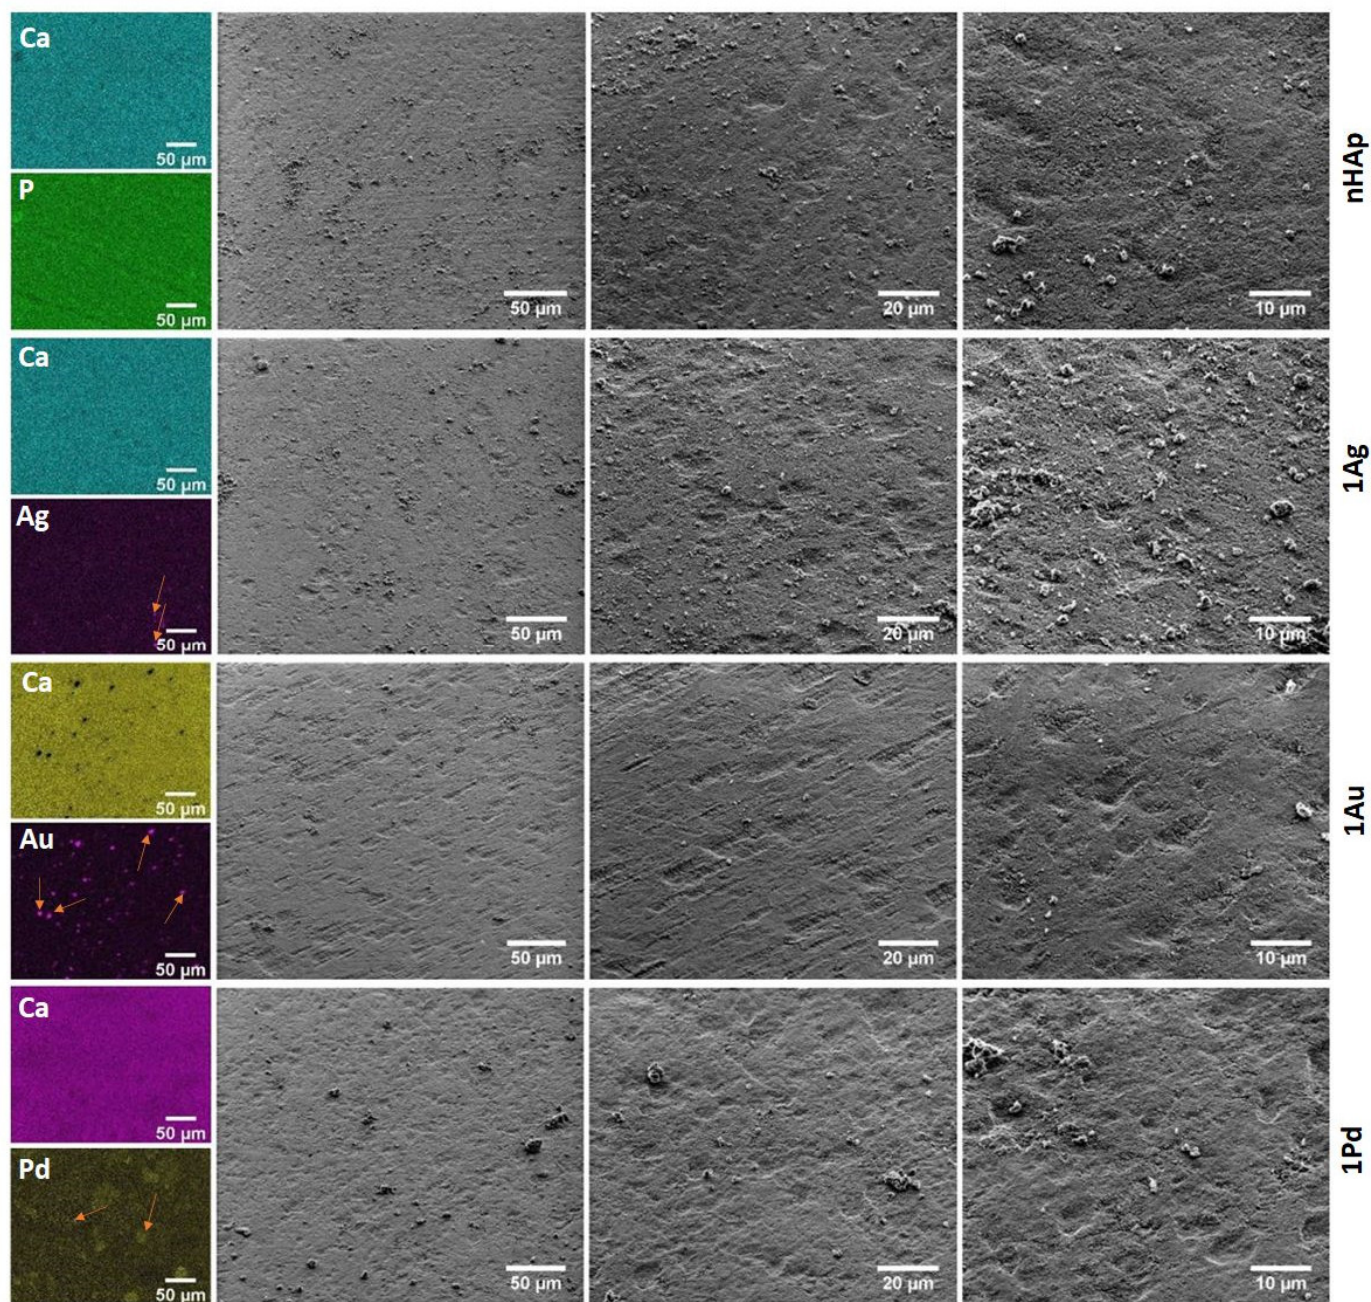

**Figure S2.** Representative SEM images (50 μm scale bar - 1000x magnification, 20 μm- 2500x, 10 μm -5000x) of the nHAp pellet and nanoapatites pellets doped with Ag<sup>+</sup>, Au<sup>+</sup> and Pd<sup>2+</sup> ions at a concentration of 1 mol% together with EDS elemental maps. Arrows on the maps indicate metallic precipitates. Sample names have been abbreviated, e.g. sample code OH-Cl-Ap: 1 mol% Au<sup>+</sup> is 1Au.



**Adhesion of Balb/3T3 fibroblasts to surface tested nanoapatites and influence of the biofilm produced by *E. faecalis* VRE 200 and *S. aureus* MRSA P19 on the viability of Balb/3T3 fibroblasts**

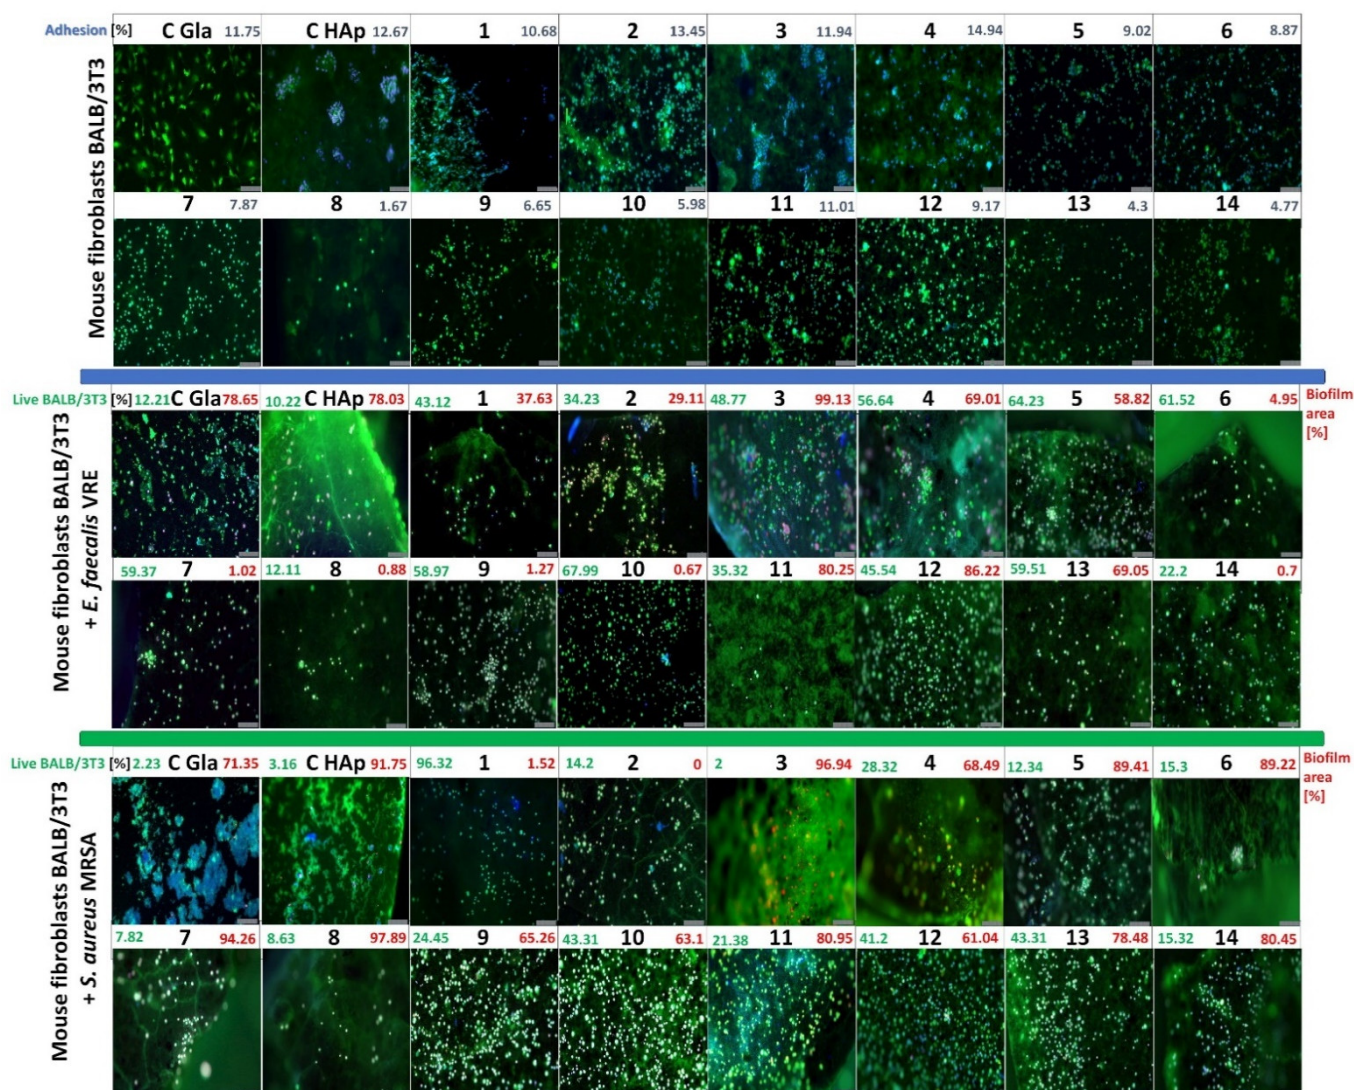

**Figure S3.** Images from the fluorescence microscopy visualisation presenting adhesion of Balb/3T3 mouse embryonic fibroblasts cells to the surface of tested biomaterials (top). Information above the photos: adhesion of fibroblasts [%] (right side) and influence of the bacterial biofilm produced by *E. faecalis* VRE 200 (in the middle) or *S. aureus* MRSA P19 (bottom) on the viability of fibroblast cells on tested nanoapatites doped of nobile metals. Information above the photos: on the left side, the Balb/3T3 viability [%]; on the right side: biofilm area [%] on surfaces of nanoapatites discs. C HAp and C Gla were a pure nanohydroxyapatite and control glass, respectively, and constituted controls of experiments. Scale bars = 100  $\mu$ m.
